# Supplementary material for: Adenosine Awakens Metabolism to Enhance Growth-Independent Killing of Tolerant and Persister Bacteria across Multiple Classes of Antibiotics
Source: PubMed Central journal article supplement (PMC9239199; doi:10.1128/mbio.00480-22), 2022-05-16
Supplement: mbio.00480-22-s0008.pdf [file mbio.00480-22-s0008.pdf]

**Supplemental Table 1: Intracellular amino acid concentrations (nmol/billion cells)**

| Compound      | NT    |       |       | Ado   |       |       | Median |       | Ado / NT    |         |
|---------------|-------|-------|-------|-------|-------|-------|--------|-------|-------------|---------|
|               | 1     | 2     | 3     | 1     | 2     | 3     | NT     | Ado   | Fold change | p-value |
| Alanine       | 3.51  | 4.00  | 3.66  | 3.86  | 3.57  | 3.94  | 3.66   | 3.86  | 1.06        | 0.731   |
| Arginine      | 0.66  | 0.63  | 0.67  | 0.46  | 0.54  | 0.53  | 0.66   | 0.53  | 0.80        | 0.005   |
| Aspartate     | 1.22  | 0.53  | 0.65  | 0.64  | 0.52  | 0.57  | 0.65   | 0.57  | 0.88        | 0.354   |
| Glutamate     | 28.93 | 32.28 | 29.97 | 28.61 | 25.48 | 25.17 | 29.97  | 25.48 | 0.85        | 0.055   |
| Histidine     | 0.12  | 0.12  | 0.11  | 0.07  | 0.07  | 0.15  | 0.12   | 0.07  | 0.61        | 0.510   |
| Isoleucine    | 0.17  | 0.17  | 0.17  | 0.15  | 0.13  | 0.16  | 0.17   | 0.15  | 0.88        | 0.050   |
| Leucine       | 0.14  | 0.11  | 0.11  | 0.09  | 0.09  | 0.13  | 0.11   | 0.09  | 0.83        | 0.444   |
| Lysine        | 3.16  | 2.85  | 3.37  | 2.98  | 2.52  | 2.57  | 3.16   | 2.57  | 0.81        | 0.105   |
| Methionine    | 0.01  | 0.01  | 0.01  | 0.01  | 0.01  | 0.01  | 0.01   | 0.01  | 0.84        | 0.379   |
| Phenylalanine | 0.41  | 0.40  | 0.41  | 0.36  | 0.33  | 0.38  | 0.41   | 0.36  | 0.89        | 0.022   |
| Proline       | 0.51  | 0.54  | 0.55  | 0.53  | 0.52  | 0.57  | 0.54   | 0.53  | 0.98        | 0.717   |
| Serine        | 0.15  | 0.11  | 0.19  | 0.22  | 0.08  | 0.50  | 0.15   | 0.22  | 1.50        | 0.399   |
| Threonine     | 0.10  | 0.11  | 0.11  | 0.11  | 0.10  | 0.18  | 0.11   | 0.11  | 1.00        | 0.399   |
| Tyrosine      | 0.32  | 0.32  | 0.33  | 0.34  | 0.32  | 0.35  | 0.32   | 0.34  | 1.05        | 0.239   |
| Valine        | 0.49  | 0.41  | 0.41  | 0.48  | 0.39  | 1.22  | 0.41   | 0.48  | 1.16        | 0.380   |
