# Supplementary material for: Adenosine Awakens Metabolism to Enhance Growth-Independent Killing of Tolerant and Persister Bacteria across Multiple Classes of Antibiotics
Source: PubMed Central journal article supplement (PMC9239199; doi:10.1128/mbio.00480-22), 2022-05-16
Supplement: mbio.00480-22-s0009.pdf [file mbio.00480-22-s0009.pdf]

## Supplemental Table 2: Strain information

### S2A: Strain MIC

| Strain                       | Gentamicin | Ciprofloxacin | Ampicillin | Ceftriaxone | Vancomycin |
|------------------------------|------------|---------------|------------|-------------|------------|
| <i>E. Coli</i> K-12 BW25113  | 4          | 0.03125 ng/mL | 4          |             |            |
| <i>S. Typhimurium</i> 14028s | 4          | 0.03125 ng/mL | 4          |             |            |
| <i>S. aureus</i> 12600       | 16         | 250 ng/mL     | 1          | 500 ng/mL   | 1          |

### S2B: Strains

| Strain                    | Relevant genetic marker(s) or features                                                                                                                                                             | Source, reference or construction                                   |
|---------------------------|----------------------------------------------------------------------------------------------------------------------------------------------------------------------------------------------------|---------------------------------------------------------------------|
| <i>E. coli</i> strains    |                                                                                                                                                                                                    |                                                                     |
| K-12 BW25113              | F-, $\Delta(\text{araD-araB})567$ , $\Delta\text{lacZ4787} (::\text{rrnB-3})$ , $\lambda$ -, $\Delta\text{guaB757}::\text{kan}$ , $\text{rph-1}$ , $\Delta(\text{rhaDrhaB})568$ , $\text{hsdR514}$ | Keio collection                                                     |
| K-12 BW25113              |                                                                                                                                                                                                    | Transformation, select strep <sup>R</sup>                           |
| K-12 BW25113 AD           | BW25113 $\Delta\text{add} \Delta\text{deoD}$                                                                                                                                                       | Transformation, select strep <sup>R</sup>                           |
| WT rrnB:GFP               | BW25113 <i>rrnB</i> P1: <i>gfp</i>                                                                                                                                                                 | Transformation, select strep <sup>R</sup> , select Kan <sup>R</sup> |
| AD rrnB:GFP               | BW25113 $\Delta\text{add} \Delta\text{deoD}$ <i>rrnB</i> P1: <i>gfp</i>                                                                                                                            | Transformation select strep <sup>R</sup> , select Kan <sup>R</sup>  |
| WT rrnD:GFP               | BW25113 <i>rrnD</i> P1: <i>gfp</i>                                                                                                                                                                 | Transformation select strep <sup>R</sup> , select Kan <sup>R</sup>  |
| AD rrnD:GFP               | BW25113 $\Delta\text{add} \Delta\text{deoD}$ <i>rrnD</i> P1: <i>gfp</i>                                                                                                                            | Transformation select strep <sup>R</sup> , select Kan <sup>R</sup>  |
| AD pWSK29 EV              | BW25113 $\Delta\text{add} \Delta\text{deoD}$ , pWSK29                                                                                                                                              | Transformation select Amp <sup>R</sup>                              |
| AD pWSK29:: <i>add</i>    | BW25113 $\Delta\text{add} \Delta\text{deoD}$ , pWSK29:: <i>add</i>                                                                                                                                 | Transformation select Amp <sup>R</sup>                              |
| AD pWSK29:: <i>deoD</i>   | BW25113 $\Delta\text{add} \Delta\text{deoD}$ , pWSK29:: <i>deoD</i>                                                                                                                                | Transformation select Amp <sup>R</sup>                              |
| CF1648                    | F-, $\lambda$ -, $\text{rph-1}$                                                                                                                                                                    | Cashel lab MG1655 WT                                                |
| CF1693                    | CF1648 $\Delta\text{relA}::\text{kan} \Delta\text{spoT}::\text{cam}$                                                                                                                               | Cashel lab (52)                                                     |
| AVT K12 WT rrnB:GFP       | CF1648 <i>rrnB</i> P1: <i>gfp</i>                                                                                                                                                                  | Transformation, select Kan <sup>R</sup>                             |
| AVT K12 RS rrnB:GFP       | CF1693 $\Delta\text{relA} \Delta\text{spoT}$ <i>rrnB</i> P1: <i>gfp</i>                                                                                                                            | Transformation, select Kan <sup>R</sup>                             |
| AVT K12 WT rrnD:GFP       | CF1648 <i>rrnD</i> P1: <i>gfp</i>                                                                                                                                                                  | Transformation, select Kan <sup>R</sup>                             |
| AVT K12 RS rrnD:GFP       | CF1693 $\Delta\text{relA} \Delta\text{spoT}$ <i>rrnD</i> P1: <i>gfp</i>                                                                                                                            | Transformation, select Kan <sup>R</sup>                             |
| <i>Salmonella</i> strains |                                                                                                                                                                                                    |                                                                     |
| 14028s                    | <i>S. Typhimurium</i>                                                                                                                                                                              | ATCC                                                                |
| 14028s AV17122            | $\Delta\text{atpB}$                                                                                                                                                                                | (43)                                                                |
| 14028s AV0438             | $\Delta\text{nuo} \Delta\text{ndh}$                                                                                                                                                                | (44)                                                                |
| <i>S. aureus</i> strain   |                                                                                                                                                                                                    |                                                                     |
| ATCC 12600                | NCTC 8532                                                                                                                                                                                          | ATCC                                                                |

### S2C: Plasmids

| Plasmid              | Description                                                                                           | Reference                   |
|----------------------|-------------------------------------------------------------------------------------------------------|-----------------------------|
| pE-FLP               | <i>ori repA101</i> , <i>flp</i> , Amp <sup>R</sup>                                                    | Addgene plasmid #45978      |
| pMSs201 rrnBP1-GFP   | <i>rrnBP1:gfp</i> , Kan <sup>R</sup>                                                                  | Dharmacon Horizon Discovery |
| pMSs201 rrnDP1-GFP   | <i>rrnDP1:gfp</i> , Kan <sup>R</sup>                                                                  | Dharmacon Horizon Discovery |
| pORTMAGE             | pBBR1 <i>oriV</i> , <i>mutL E32K</i> , $\lambda$ rep (ts), <i>beta</i> , <i>exo</i> , Cm <sup>R</sup> | Addgene plasmid #72679      |
| pWSK29               | Amp <sup>R</sup>                                                                                      | Addgene plasmid #172972     |
| pWSK29:: <i>add</i>  | <i>add</i> , Amp <sup>R</sup>                                                                         |                             |
| pWSK29:: <i>deoD</i> | <i>deoD</i> , Amp <sup>R</sup>                                                                        |                             |
